# Supplementary material for: Mechanism of Antiradical Activity of Coumarin-Trihydroxybenzohydrazide Derivatives: A Comprehensive Kinetic DFT Study
Source: MDPI journal article supplement (doi:10.3390/antiox13020143), 2024-01-24
Supplement: s1 [file s1]

**Supplementary Material**

**for**

**Mechanism of antiradical activity of coumarin-  
trihydroxybenzohydrazide derivatives: A comprehensive  
kinetic DFT study**

**Žiko Milanović <sup>1</sup>, Dušan Dimić <sup>2</sup>, Edina H. Avdović <sup>1</sup>, Dušica M. Simijonović <sup>1</sup>, Đura  
Nakarada <sup>2</sup>, Vladimir Jakovljević <sup>3</sup>, and Radiša Vojinović <sup>3,\*</sup>, Zoran S. Marković <sup>1,4</sup>**

*<sup>1</sup>University of Kragujevac, Institute for Information Technologies, Department of Science, Liceja  
Kneževine Srbije 1A, 34000 Kragujevac, Serbia;*

*<sup>2</sup>University of Belgrade, Faculty of Physical Chemistry, Studentski trg 12-16, 11000 Belgrade,  
Serbia;*

*<sup>3</sup>University of Kragujevac, Faculty of Medical Sciences, Svetozara Markovića 69, 34000  
Kragujevac, Republic of Serbia;*

*<sup>4</sup>State University of Novi Pazar, Department of Natural Science and Mathematics, Vuka  
Karadžića bb, 36300, Novi Pazar, Serbia, Serbia;*

*\*Correspondence: rhvojinovic@medf.kg.ac.rs; Tel.: +381 34 306 800*

To quantify the molar fractions of acid-base species, the relationship between the acid constants ( $Ka$ ) and the  $pK_a$  values as well as the expression for the equilibrium constant of the deprotonation process was used:

$$Ka_1 = 10^{-pKa_1} \quad (1s)$$

$$Ka_2 = 10^{-pKa_2} \quad (2s)$$

$$Ka_3 = 10^{-pKa_3} \quad (3s)$$

$$Ka_4 = 10^{-pKa_4} \quad (4s)$$

$$Ka_1 = \frac{[H_3A^-][H^+]}{[H_4A]} \quad (5s)$$

$$Ka_2 = \frac{[H_2A^{2-}][H^+]}{[H_3A^-]} \quad (6s)$$

$$Ka_3 = \frac{[HA^{3-}][H^+]}{[H_2A^{2-}]} \quad (7s)$$

$$Ka_4 = \frac{[A^{4-}][H^+]}{[HA^{3-}]} \quad (8s)$$

Molar fractions ( $f$ ) of the represented acid-base species, were calculated using the following equations:

$$f(A^{4-}) = \frac{1}{1 + \beta_1[H^+] + \beta_2[H^+]^2 + \beta_3[H^+]^3 + \beta_4[H^+]^4} \quad (9s)$$

$$f(HA^{3-}) = \beta_1 [H^+] f(A^{4-}) \quad (10s)$$

$$f(H_2A^{2-}) = \beta_2 [H^+]^2 f(HA^{3-}) \quad (11s)$$

$$f(H_3A^-) = \beta_3 [H^+]^3 f(H_2A^{2-}) \quad (12s)$$

where  $[H^+]$  represents the concentration of hydrogen ions at physiological pH in this case ( $[H^+]=3.98 \times 10^{-8} M$ ), while  $\beta$  represents global formation equilibrium constants:

$$\beta_1 = 10^{pKa4} \quad (13s)$$

$$\beta_2 = 10^{pKa4 + pKa3} \quad (14s)$$

$$\beta_3 = 10^{pKa4 + pKa3 + pKa2} \quad (15s)$$

$$\beta_4 = 10^{pKa4 + pKa3 + pKa2 + pKa1} \quad (16s)$$

The overall rate constants ( $k_{overall}$ ) for the reactions between the investigated compounds and  $HO^\bullet$  were calculated by the following equations:

$$k_{overall} = f(H_4A) \times k_{TOT}^{H_4A} + f(H_3A^-) \times k_{TOT}^{H_3A^-} + f(H_2A^{2-}) \times k_{TOT}^{H_2A^{2-}} + f(HA^{3-}) \times k_{TOT}^{HA^{3-}} + f(A^{4-}) \times k_{TOT}^{A^{4-}} \quad (17s)$$

Due to the very small proportion of acid-base species at physiological pH, eq. 17s can be represented as:

$$k_{overall}^{Comp1} = f(H_4A) \times k_{TOT}^{H_4A} + f(H_3A^-) \times k_{TOT}^{H_3A^-} + f(H_2A^{2-}) \times k_{TOT}^{H_2A^{2-}} \quad (18s)$$

$$k_{overall}^{Comp2} = f(H_4A) \times k_{TOT}^{H_4A} + f(H_3A^-) \times k_{TOT}^{H_3A^-} \quad (19s)$$

where  $k_{TOT}$  represent the sum of the favorable reaction pathways for the investigation species and  $HO^\bullet$ :

$$k_{TOT} = k_{HAT} + k_{RAF} + k_{SPL} + k_{ET} \quad (20s)$$

Antioxidative capacity  $r^T$  of the examined antioxidant relative to trolox (**Tx**)/gallic acid (**GA**) ( $k_{overall}^{Ref}$ ) was calculated using the formula:

$$r^T = \frac{k_{overall}}{k_{overall}^{Ref}} \quad (21s)$$

The relative amounts of products (%), i.e. branching ratios ( $\Gamma_i$ ) were determined:

$$\Gamma_i = \frac{k_i}{k_{overall}} \quad (22s)$$

to evaluate which of the mechanistic pathways,  $i$ , is dominant.

Standard mechanisms of antioxidant action between neutral forms of the investigated compounds and  $HO^\bullet$  radical:

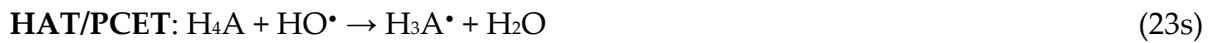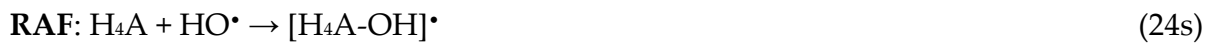

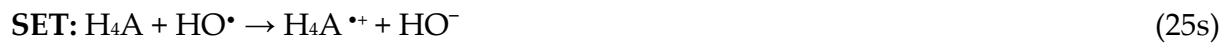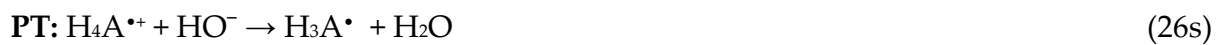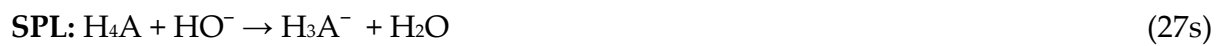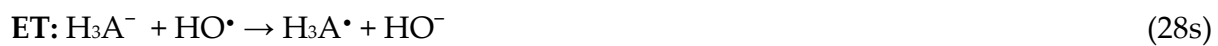

where  $\text{H}_4\text{A}$ ,  $\text{H}_3\text{A}^\bullet$ ,  $[\text{HO}-\text{H}_4\text{A}]^\bullet$ ,  $\text{H}_4\text{A}^{\bullet+}$ , and  $\text{H}_3\text{A}^-$  denote neutral species, its radical, radical adduct, radical cation, and anion.

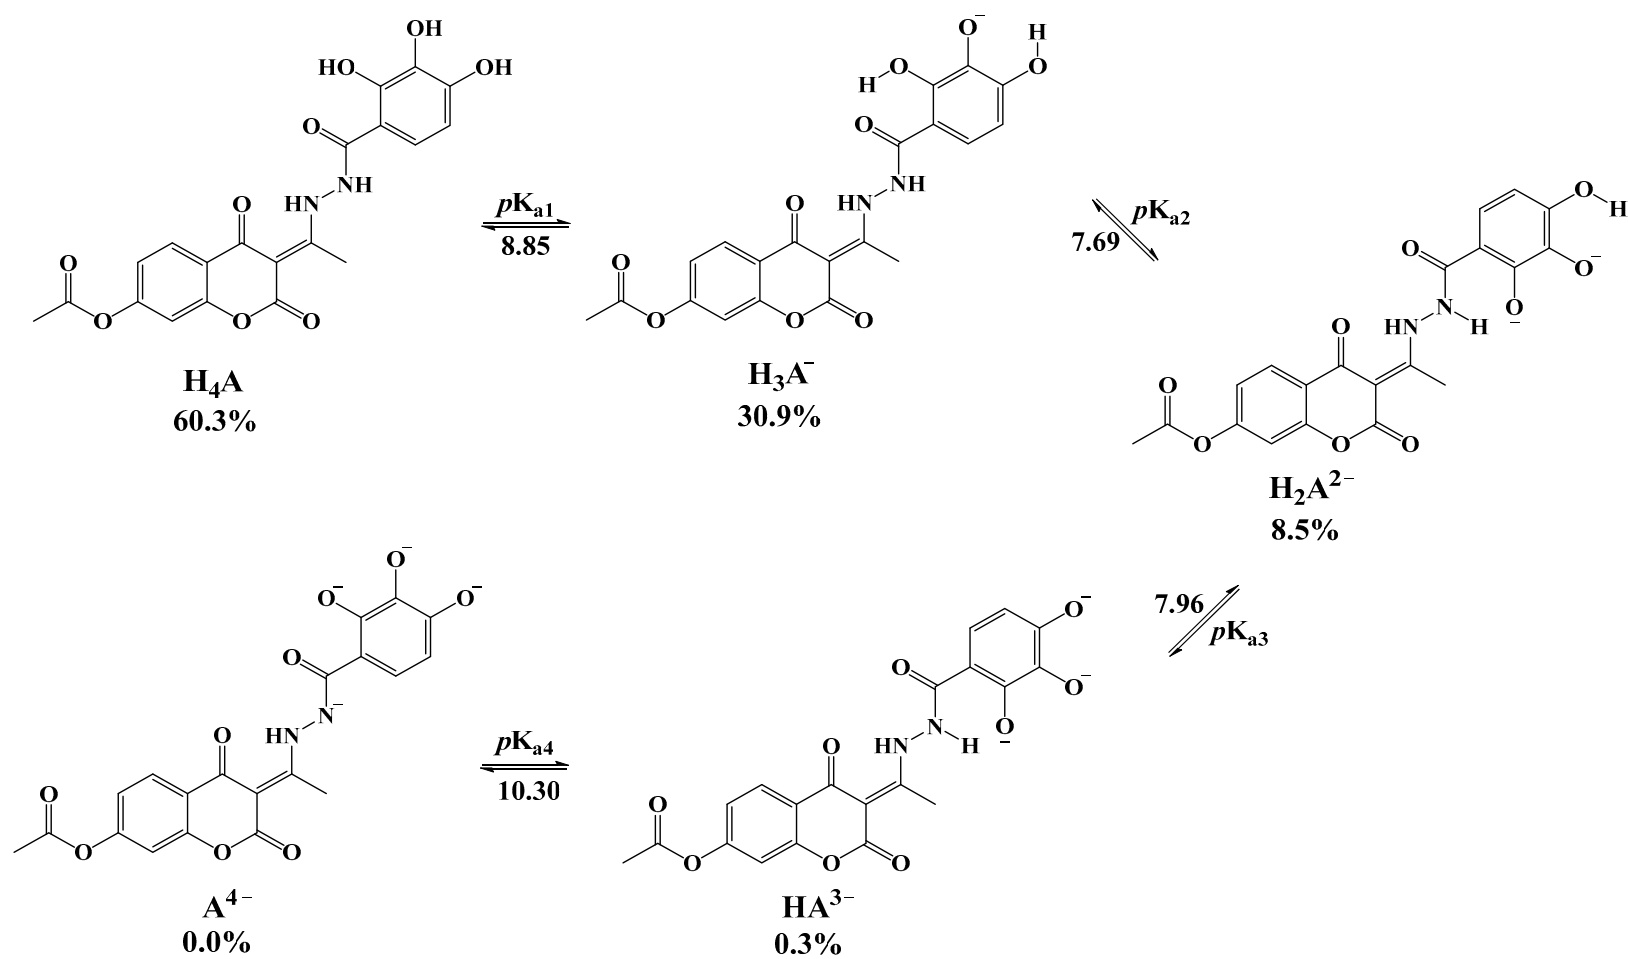

**Figure S1.** Deprotonation route, estimated  $pK_a$  values and molar fractions of acid-base species of **1** at physiological pH (7.4)

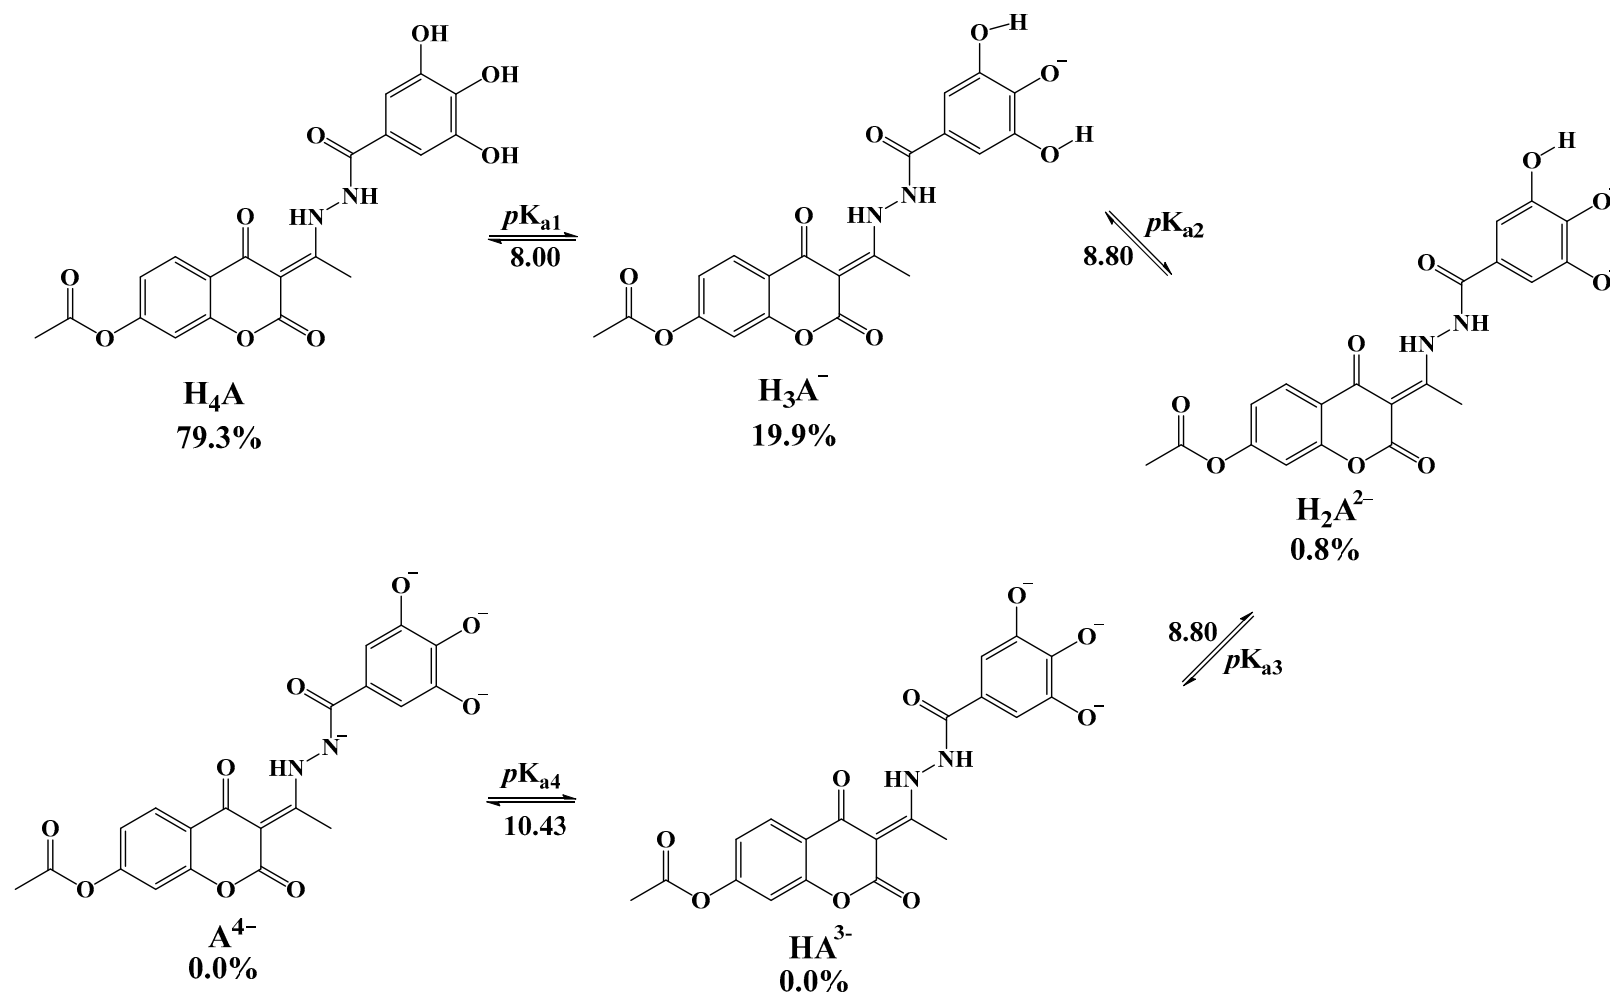

**Figure S2.** Deprotonation route, estimated  $pK_a$  values and molar fractions of acid-base species of **2** at physiological pH (7.4)

**Table S1.** 2D geometries of the investigated acid-base species of **1** compound that participate in the various investigated mechanisms of antiradical action. The black color describes the thermodynamically favored products obtained between neutral species **H<sub>4</sub>A** and HO•. The red color describes the favored products obtained between monoanionic species **H<sub>3</sub>A<sup>-</sup>**(**H<sub>3</sub>A•**) and HO•, while the blue color describes favored products obtained between dianionic species **H<sub>2</sub>A<sup>2-</sup>**(**H<sub>2</sub>A•<sup>-</sup>**) and HO•.

|                                                                                                                                            |                                                                                     |                                                                                      |                                                                                       |
|--------------------------------------------------------------------------------------------------------------------------------------------|-------------------------------------------------------------------------------------|--------------------------------------------------------------------------------------|---------------------------------------------------------------------------------------|
| 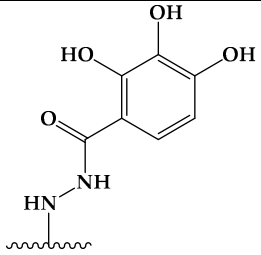 <p style="text-align: center;"><b>H<sub>4</sub>A</b></p> |                                                                                     |                                                                                      |                                                                                       |
| SPLET ( <b>H<sub>4</sub>A</b> )                                                                                                            |                                                                                     |                                                                                      |                                                                                       |
|                                                          |   |   |   |
| 2''-OH                                                                                                                                     | 3''-OH                                                                              | 4''-OH                                                                               | N2-H                                                                                  |
| HAT/PCET ( <b>H<sub>4</sub>A</b> )                                                                                                         |                                                                                     |                                                                                      |                                                                                       |
|                                                         |  |  |  |
| 2''-OH                                                                                                                                     | 3''-OH                                                                              | 4''-OH                                                                               | N2-H                                                                                  |
|                                                         |                                                                                     |                                                                                      |                                                                                       |



|                                                                        |             |      |
|------------------------------------------------------------------------|-------------|------|
| $\text{H}_3\text{A}^\bullet / \text{H}_3\text{A}^-$                    |             |      |
| HAT/PCET ( $\text{H}_3\text{A}^\bullet / \text{H}_3\text{A}^-$ )       |             |      |
|                                                                        |             |      |
| 2''-OH                                                                 | 4''-OH      | N2-H |
| PT ( $\text{H}_3\text{A}^\bullet / \text{H}_3\text{A}^-$ )             |             |      |
|                                                                        |             |      |
| 2''-OH                                                                 | 4''-OH      | N2-H |
|                                                                        |             |      |
| $\text{H}_2\text{A}^{2-} / \text{H}_2\text{A}^{\bullet-}$              |             |      |
| HAT/PCET ( $\text{H}_2\text{A}^{2-} / \text{H}_2\text{A}^{\bullet-}$ ) |             |      |
|                                                                        |             |      |
| 4''-OH                                                                 | 2-NH/2''-OH |      |
| PT ( $\text{H}_2\text{A}^{2-} / \text{H}_2\text{A}^{\bullet-}$ )       |             |      |

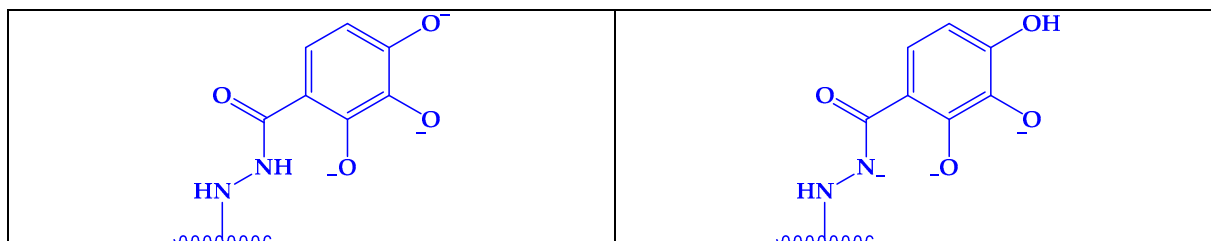

**Table S2.** 2D geometries of the investigated acid-base species of compound **2** that participate in the various investigated mechanisms of antiradical action. The black color describes the thermodynamically favored products obtained between neutral species **H<sub>4</sub>A** and HO<sup>•</sup>. The red color describes the favored products obtained between monoanionic species **H<sub>3</sub>A<sup>-</sup>** (**H<sub>3</sub>A<sup>•</sup>**) and HO<sup>•</sup>.

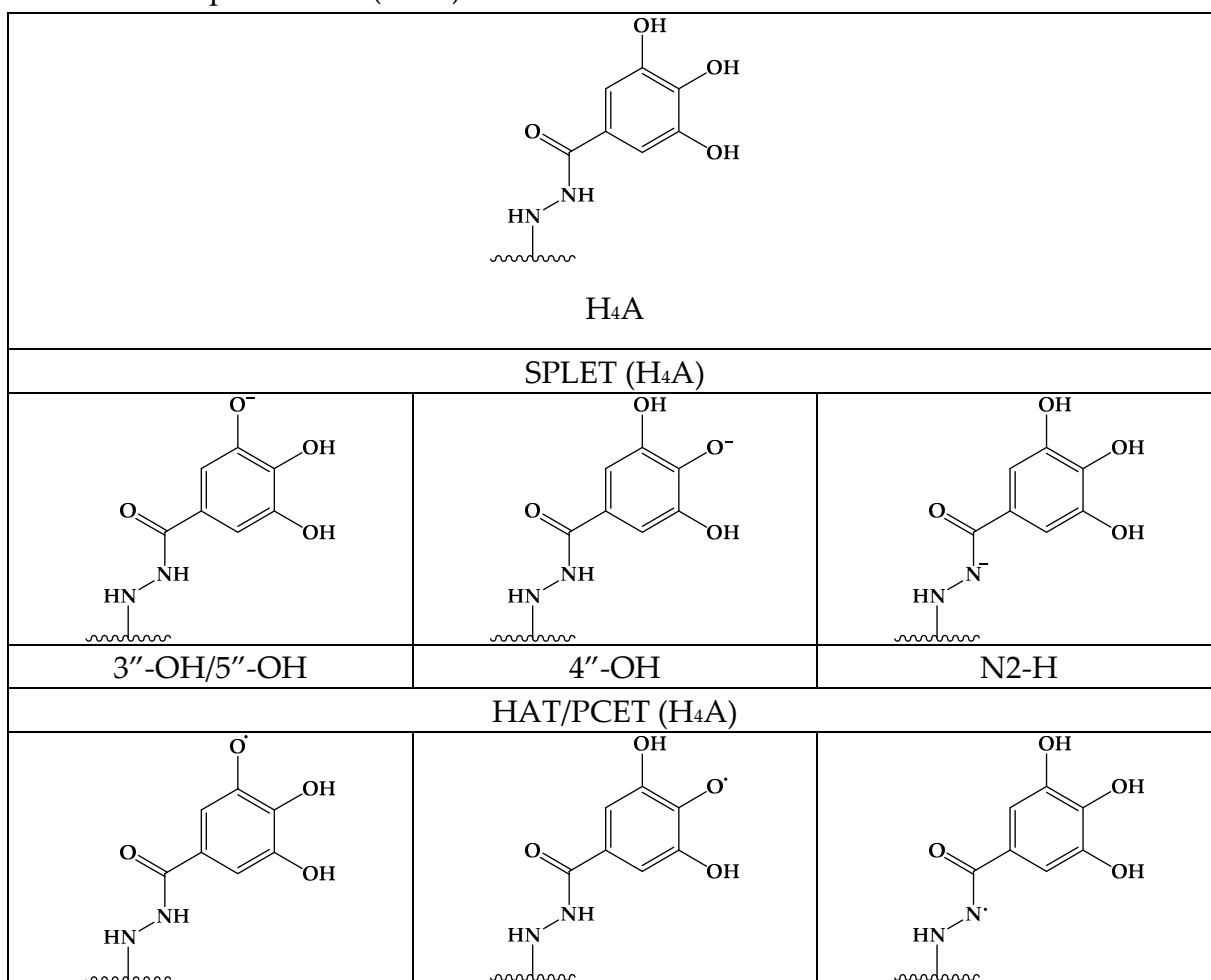

|                                                                  |        |      |
|------------------------------------------------------------------|--------|------|
| <br>$\text{H}_3\text{A}^\bullet$                                 |        |      |
| HAT/PCET ( $\text{H}_3\text{A}^\bullet / \text{H}_3\text{A}^-$ ) |        |      |
|                                                                  |        |      |
| 3''-OH                                                           | 5''-OH | N2-H |
| PL ( $\text{H}_3\text{A}^\bullet / \text{H}_3\text{A}^-$ )       |        |      |
|                                                                  |        |      |
| 3''-OH                                                           | 5''-OH | N2-H |

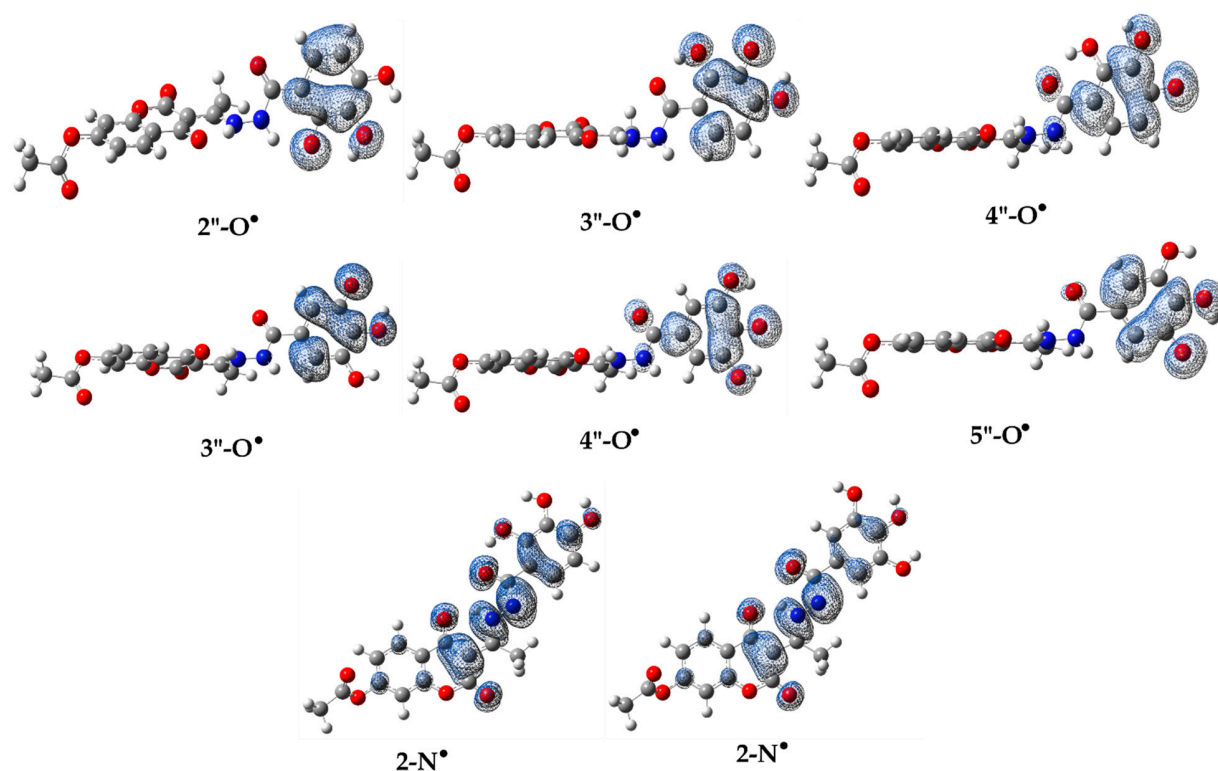

**Figure S3.** Spin density distribution maps (0.002 electrons/bohr<sup>3</sup>) of formed radical species formed in the reaction between **H<sub>4</sub>A** of compounds **1** (a,c) and **2** (b,d) and HO• radical. Blue color represents positive spin density values.

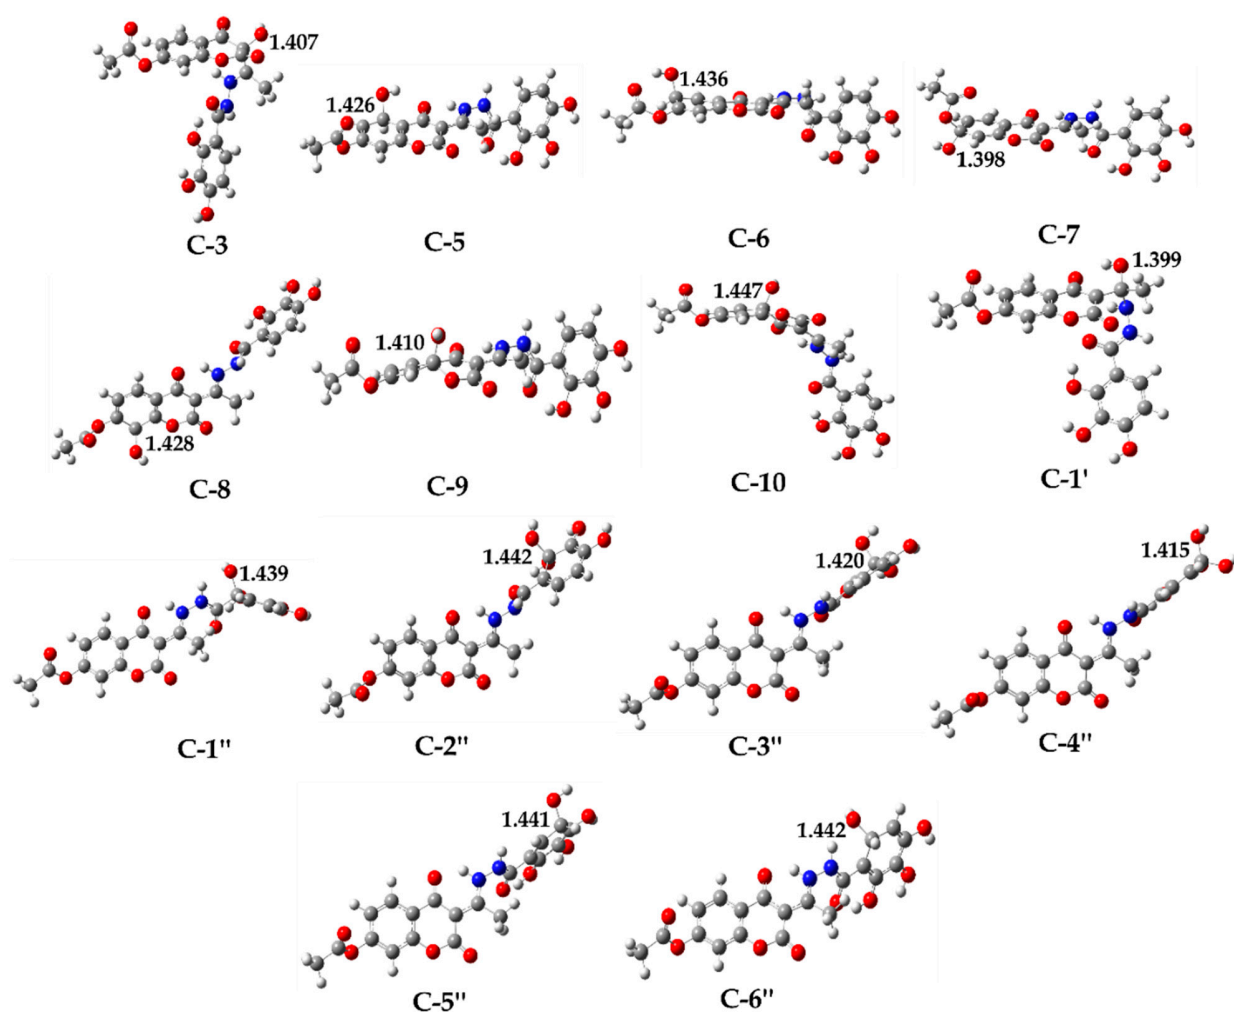

**Figure S4.** Optimized geometries of radical adducts with characteristic intramolecular distances (Å) formed between H<sub>4</sub>A of compound 1 and HO•

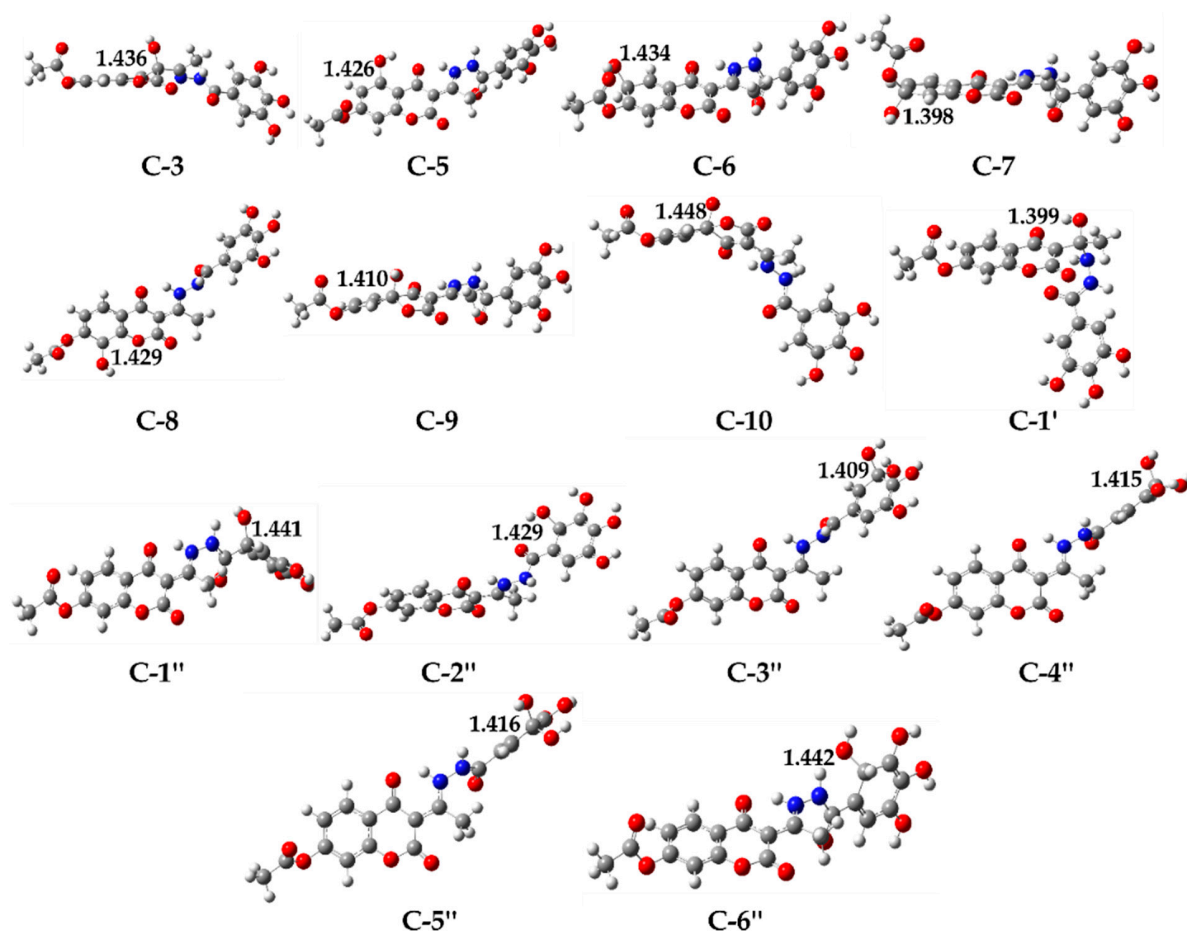

**Figure S5.** Optimized geometries of radical adducts with characteristic intramolecular distances (Å) formed between **H<sub>4</sub>A** of compound **2** and HO•

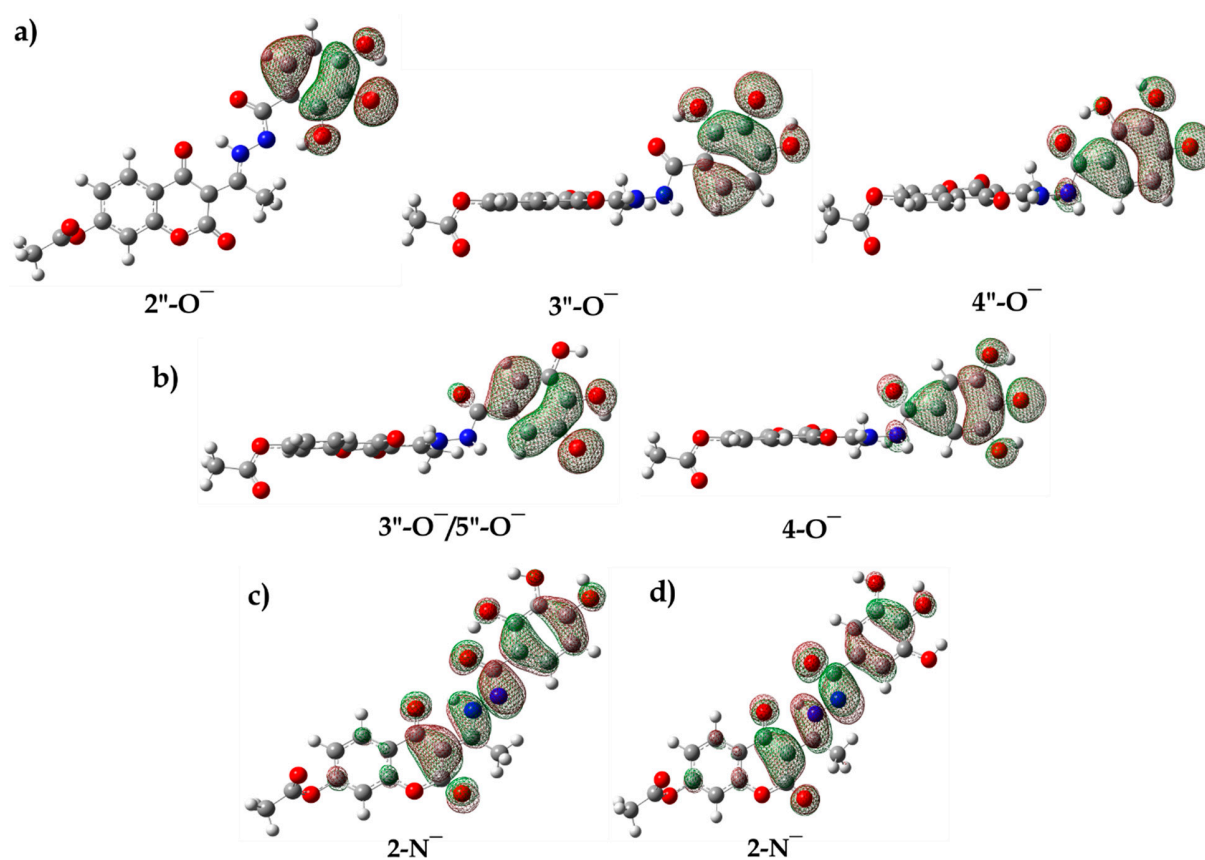

**Figure S6.** HOMO (*Highest Occupied Molecular Orbital*) orbitals of formed phenoxide anions formed in the reaction between **H<sub>4</sub>A** of compounds **1** (a,c) and **2** (b,d) and HO<sup>-</sup>

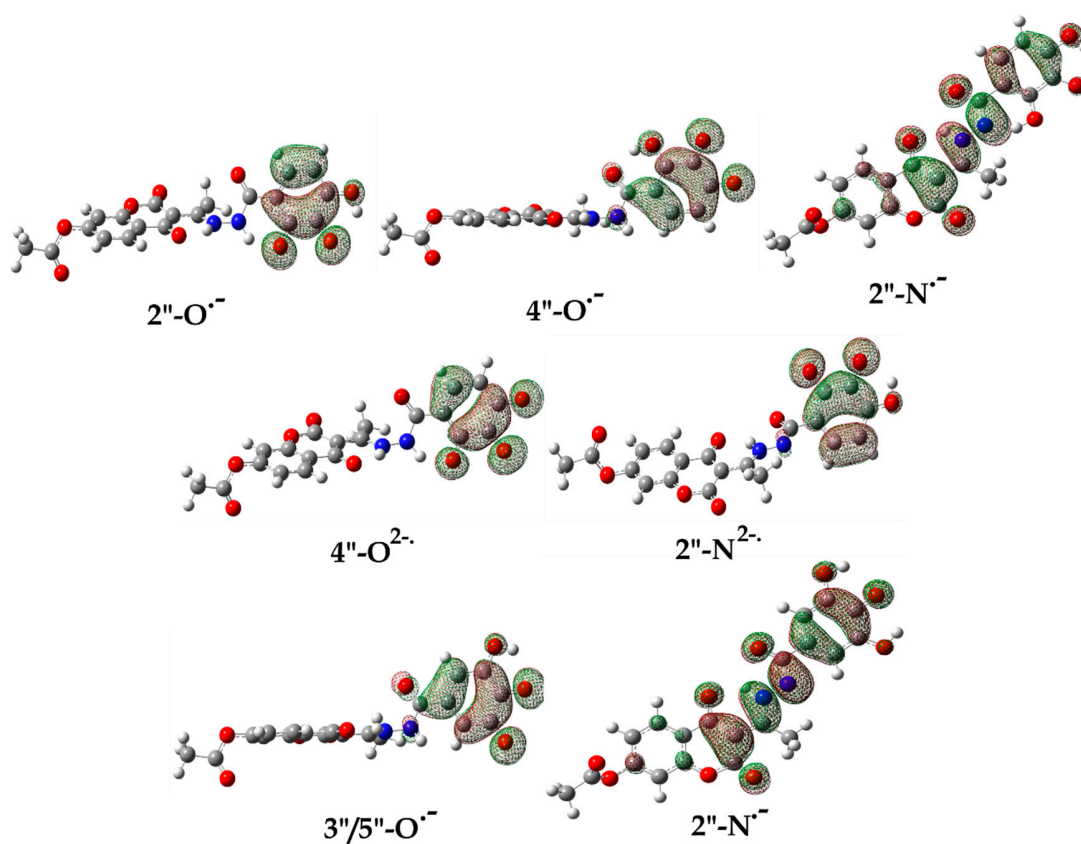

**Figure S7.** HOMO orbitals for the corresponding  $\text{H}_2\text{A}^{\bullet-}$  nad  $\text{H}_2\text{A}^{2\bullet-}$  species formed in the reaction of proton transfer from  $\text{H}_3\text{A}^{\bullet}$  (top) and  $\text{H}_3\text{A}^{\bullet-}$  (middle) of compound **1** to  $\text{HO}^-$  as well as from  $\text{H}_3\text{A}^{\bullet}$  of compound **2** (bottom) to  $\text{HO}^-$ .



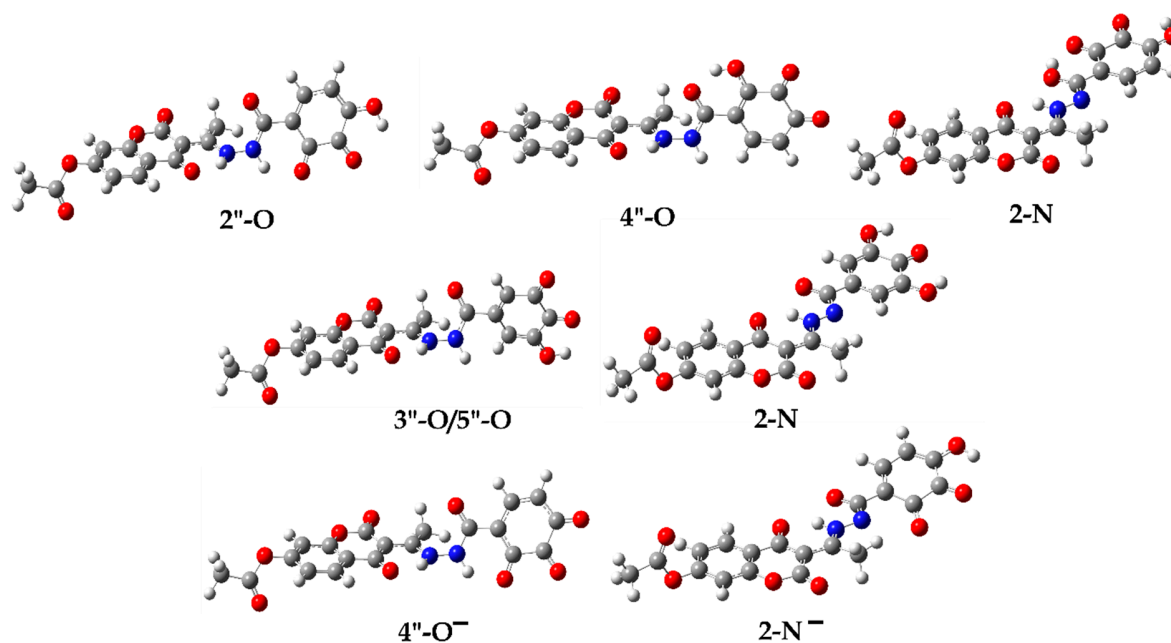

**Figure S8.** Optimized geometries of neutral  $\text{H}_2\text{A}$  products of compounds 1 (top) and 2 (middle) and monoanionic  $\text{HA}^-$  product (bottom) formed in the reaction between  $\text{H}_3\text{A}^\bullet$  and  $\text{H}_2\text{A}^{\bullet-}$  and  $\text{HO}^\bullet$ .

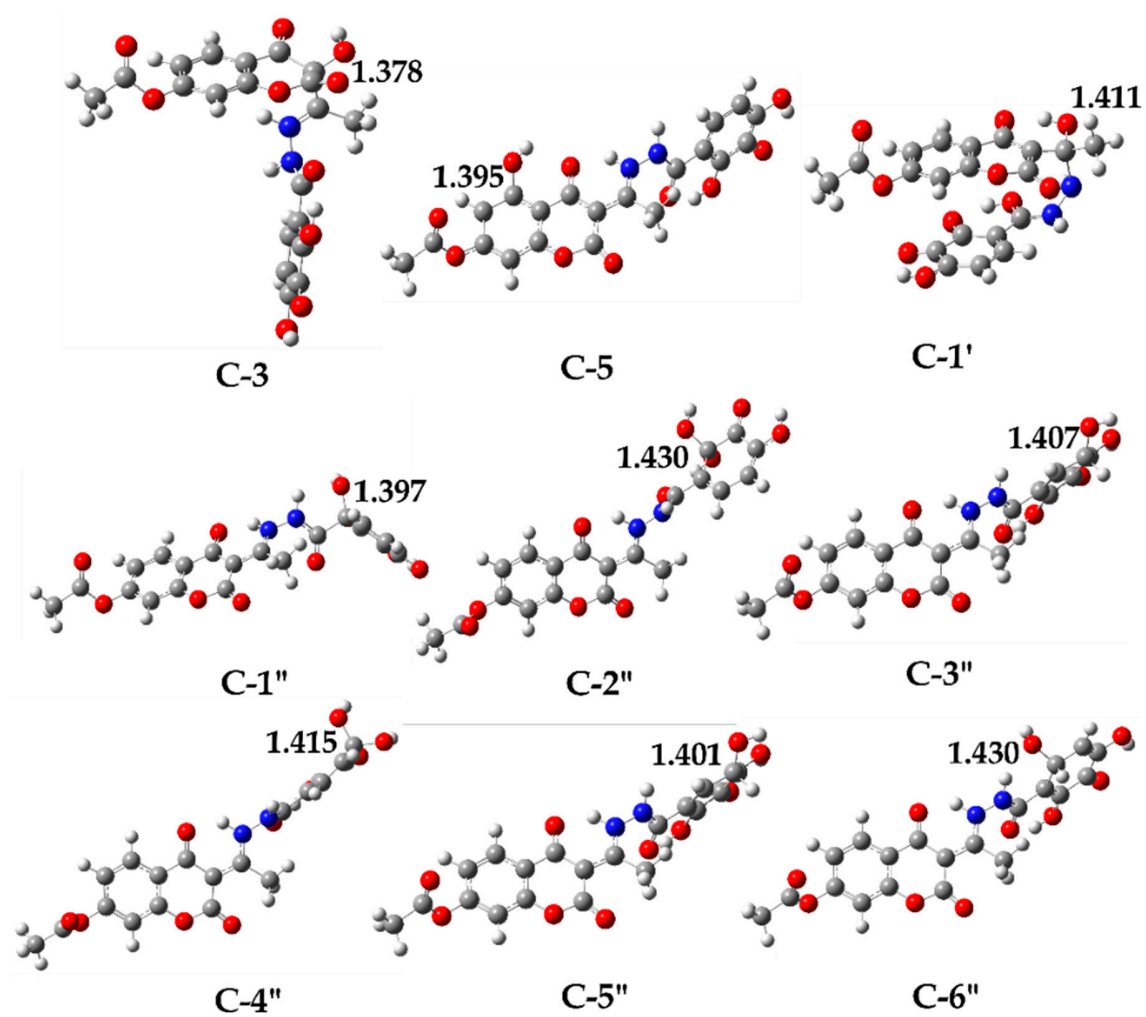

**Figure S9.** Optimized geometries of adducts with characteristic intramolecular distances (Å) formed between  $\text{H}_3\text{A}^\bullet$  of compound 1 and  $\text{HO}^\bullet$

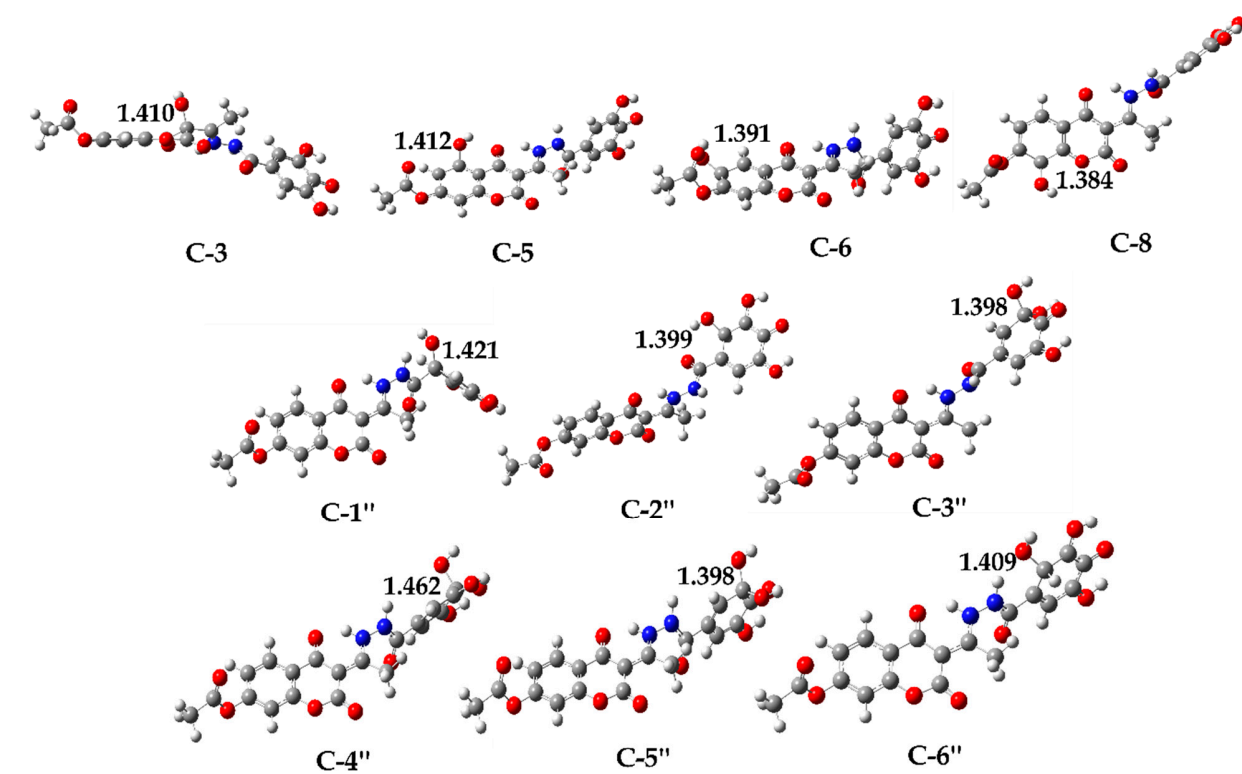

**Figure S10.** Optimized geometries of adducts with characteristic intramolecular distances (Å) formed between  $\text{H}_3\text{A}^\bullet$  of compound 2 and  $\text{HO}^\bullet$

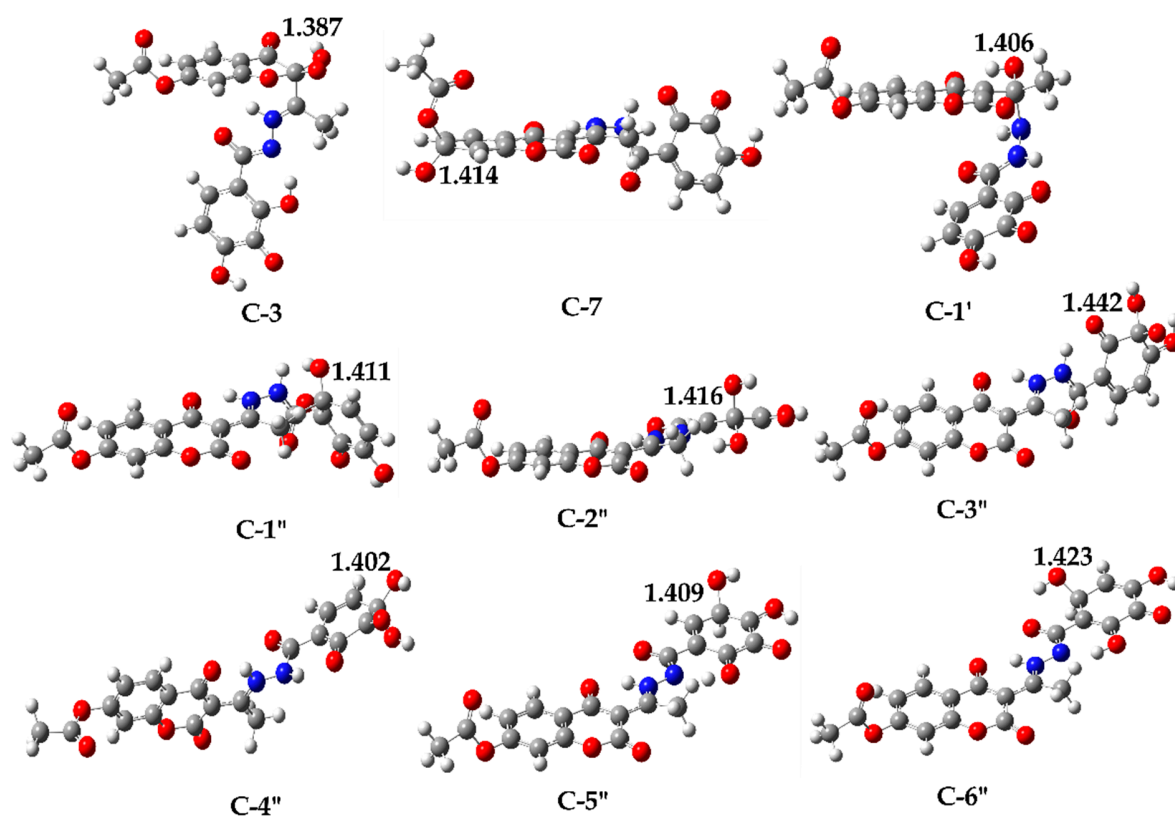

**Figure S11.** Optimized geometries of adducts with characteristic intramolecular distances (Å) formed between  $\text{H}_3\text{A}^{\bullet-}$  of compound 1 and  $\text{HO}^\bullet$

**Table S3.** Estimated values of kinetic parameters: activation energy ( $\Delta G_a$ , kJ mol<sup>-1</sup>), rate constants of the bimolecular chemical reactions (M<sup>-1</sup>s<sup>-1</sup>) between the investigated compounds and HO• estimated by the Transition State Theory ( $k_{TST}$ ).

| <b>HAT/PCET</b>        |                           |                       |                           |                      |
|------------------------|---------------------------|-----------------------|---------------------------|----------------------|
| <b>1/2</b><br>Position | <b>1 (H<sub>4</sub>A)</b> |                       | <b>2 (H<sub>4</sub>A)</b> |                      |
|                        | $\Delta G_a^{HAT}$        | $k_{TST}^{HAT}$       | $\Delta G_a^{HAT}$        | $k_{TST}^{HAT}$      |
| <b>2''-OH/3''-OH</b>   | 58                        | 9.53×10 <sup>3</sup>  | 59                        | 6.79×10 <sup>3</sup> |
| <b>3''-OH/5''-OH</b>   | 41                        | 8.26×10 <sup>6</sup>  |                           |                      |
| <b>4''-OH/4''-OH</b>   | 55                        | 6.28×10 <sup>4</sup>  | 54                        | 6.28×10 <sup>4</sup> |
| Position               | <b>RAF</b>                |                       |                           |                      |
|                        | <b>1 (H<sub>4</sub>A)</b> |                       | <b>2 (H<sub>4</sub>A)</b> |                      |
|                        | $\Delta G_a^{RAF}$        | $k_{TST}^{RAF}$       | $\Delta G_a^{RAF}$        | $k_{TST}^{RAF}$      |
| <b>C-3</b>             | 38                        | 3.29×10 <sup>7</sup>  | 48                        | 6.19×10 <sup>5</sup> |
| <b>C-5</b>             | 51                        | 1.88×10 <sup>5</sup>  | 56                        | 2.72×10 <sup>4</sup> |
| <b>C-6</b>             | 38                        | 3.26×10 <sup>7</sup>  | 45                        | 2.13×10 <sup>6</sup> |
| <b>C-7</b>             | 60                        | 1.60×10 <sup>3</sup>  | 63                        | 1.53×10 <sup>3</sup> |
| <b>C-8</b>             | 39                        | 2.59×10 <sup>7</sup>  | 41                        | 9.33×10 <sup>6</sup> |
| <b>C-9</b>             | 50                        | 2.27×10 <sup>5</sup>  | 53                        | 7.10×10 <sup>4</sup> |
| <b>C-10</b>            | 43                        | 4.01×10 <sup>6</sup>  | 47                        | 9.34×10 <sup>5</sup> |
| <b>C-1'</b>            | 42                        | 7.23×10 <sup>6</sup>  | 45                        | 1.80×10 <sup>6</sup> |
| <b>C-1''</b>           | 37                        | 5.60×10 <sup>7</sup>  | 35                        | 1.02×10 <sup>8</sup> |
| <b>C-2''</b>           | 39                        | 2.71×10 <sup>7</sup>  | 29                        | 1.40×10 <sup>9</sup> |
| <b>C-3''</b>           | 22                        | 1.91×10 <sup>10</sup> | 47                        | 9.00×10 <sup>5</sup> |
| <b>C-4''</b>           | 38                        | 3.17×10 <sup>7</sup>  | 29                        | 1.53×10 <sup>9</sup> |
| <b>C-5''</b>           | 38                        | 3.38×10 <sup>7</sup>  | 39                        | 2.08×10 <sup>7</sup> |
| <b>C-6''</b>           | 28                        | 2.06×10 <sup>7</sup>  | 25                        | 6.80×10 <sup>9</sup> |

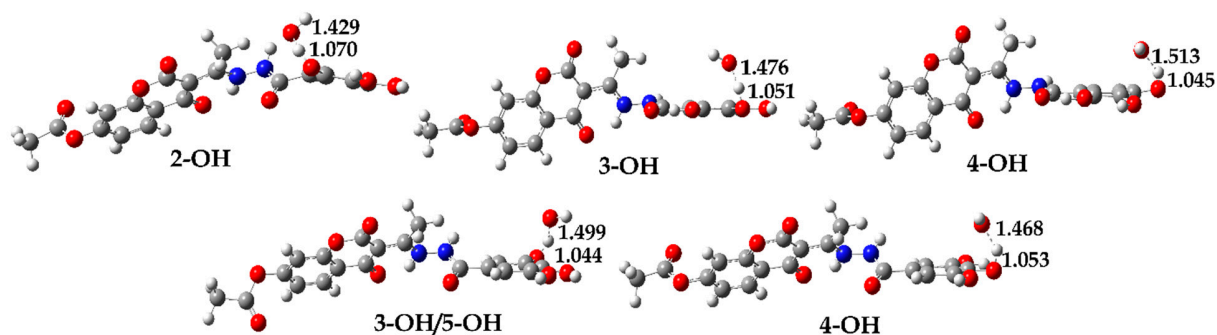

**Figure S12.** Optimized transition state geometries for HAT/PCET reaction pathways between neutral  $\text{H}_4\text{A}$  of compound **1** (top) and **2** (bottom) and  $\text{HO}^\bullet$  with characteristic intraatomic distances ( $\text{\AA}$ )

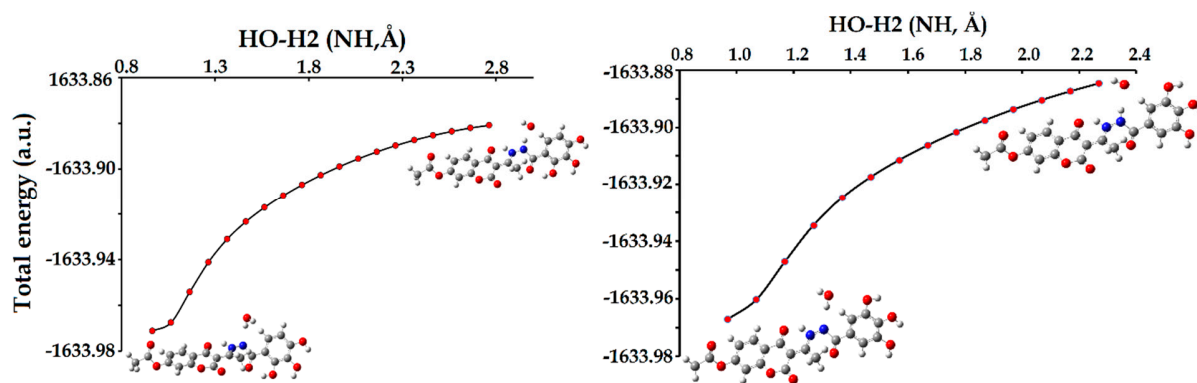

**Figure S13.** Dependence of the total energy (a.u.) on the HO–H2 characteristic distance ( $\text{\AA}$ ) for the HAT/PCET mechanism between neutral  $\text{H}_4\text{A}$  of compound **1** (left) and **2** (right) and  $\text{HO}^\bullet$

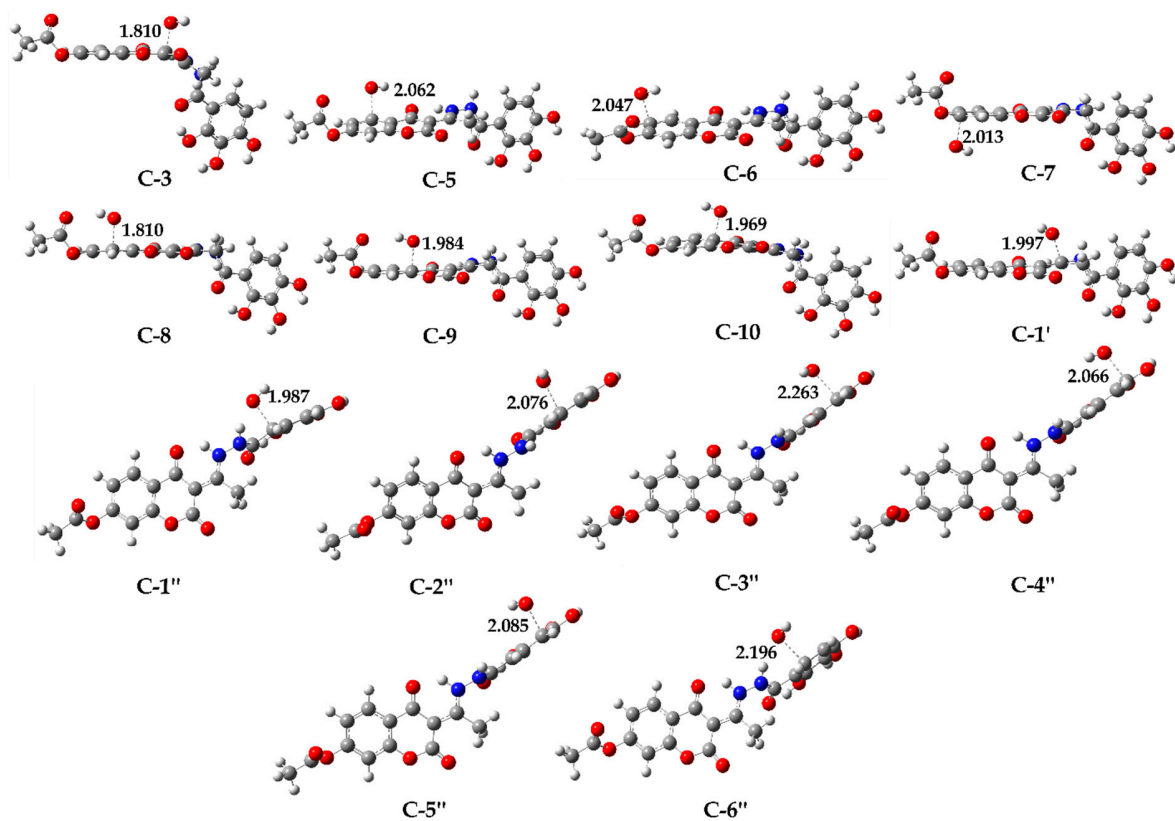

**Figure S14.** Optimized transition state geometries for the RAF mechanism between neutral  $\text{H}_4\text{A}$  of compound **1** and  $\text{HO}^\bullet$  at the M06-2X/6-311++G(d,p) level of theory with characteristic intermolecular distances (Å)

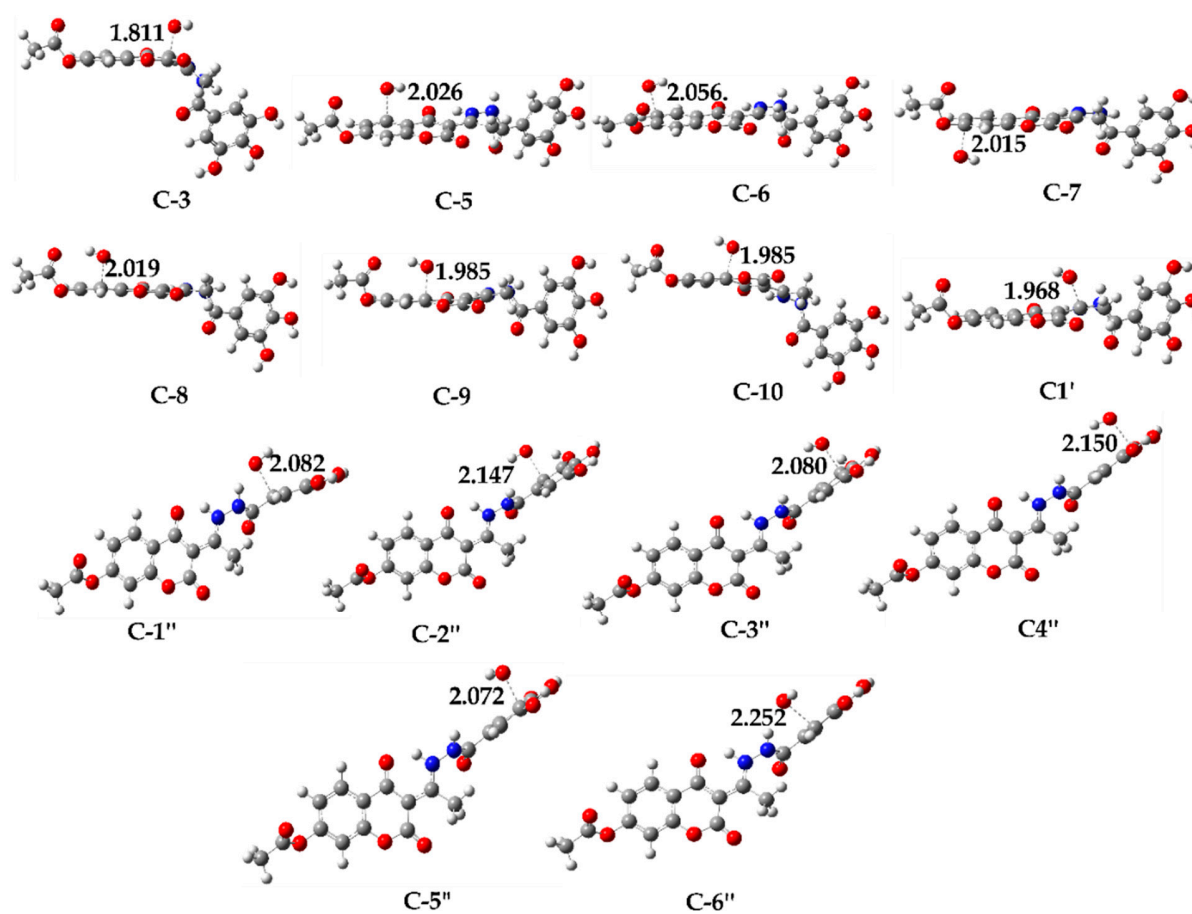

**Figure S15.** Optimized transition state geometries for the RAF mechanism between neutral  $\text{H}_4\text{A}$  of compound **2** and  $\text{HO}^\bullet$  at the M06-2X/6-311++G(d,p) level of theory with characteristic intermolecular distances (Å)



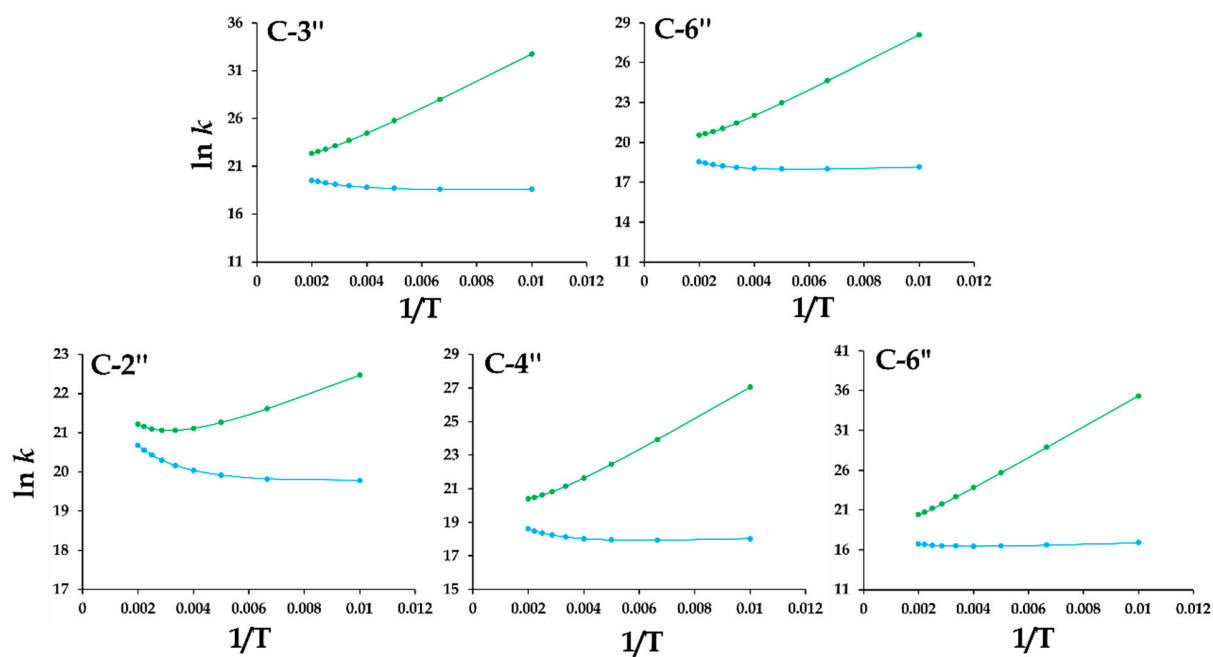

**Figure S16.** Graph of the dependence of  $\ln k_{\text{TST}}$  (green line) and  $\ln k_{\text{ZCT}_0}$  (blue line) on the reciprocal values of temperature for the RAF mechanism (1 (top) and 2 (bottom))

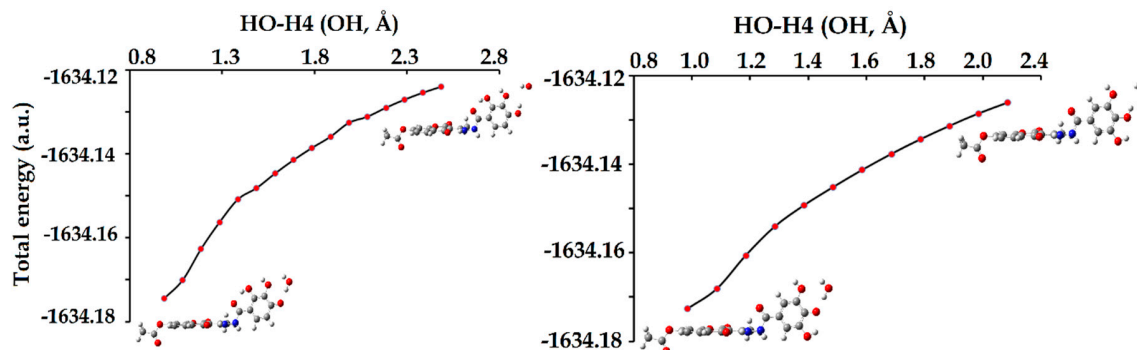

**Figure S17.** Dependence of the total energy (a.u.) on the HO-H4 characteristic distance (Å) for the SPL mechanism between neutral  $\text{H}_4\text{A}$  of compound 1 (left) and 2 (right) and  $\text{HO}^-$

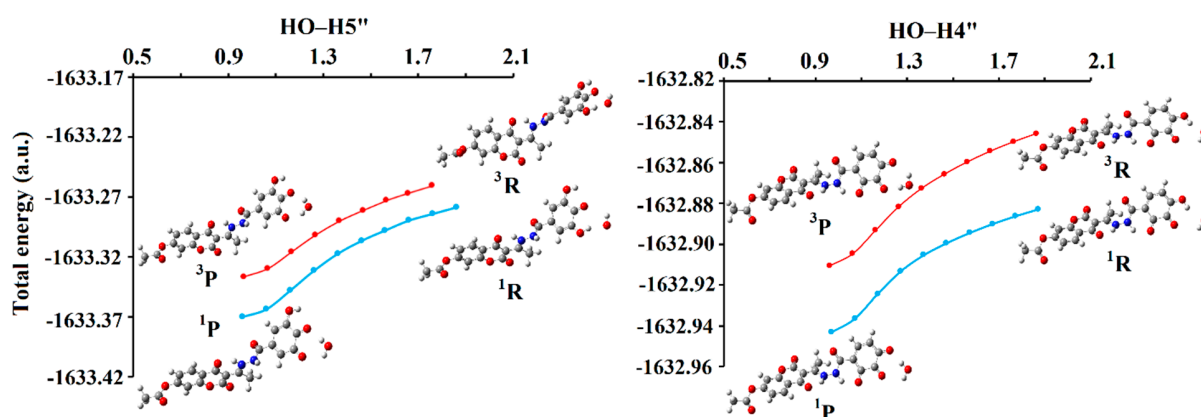

**Figure S18.** Energy profile for the HAT/PCET reaction pathway between  $\text{H}_3\text{A}^\bullet$  of compound **2** and  $\text{HO}^\bullet$  (left) as well as  $\text{H}_2\text{A}^{\bullet-}$  of compound **1** and  $\text{HO}^\bullet$  (right) in the singlet (blue) and triplet (red) spin states. Interatomic distances are given in angstroms [ $\text{\AA}$ ]

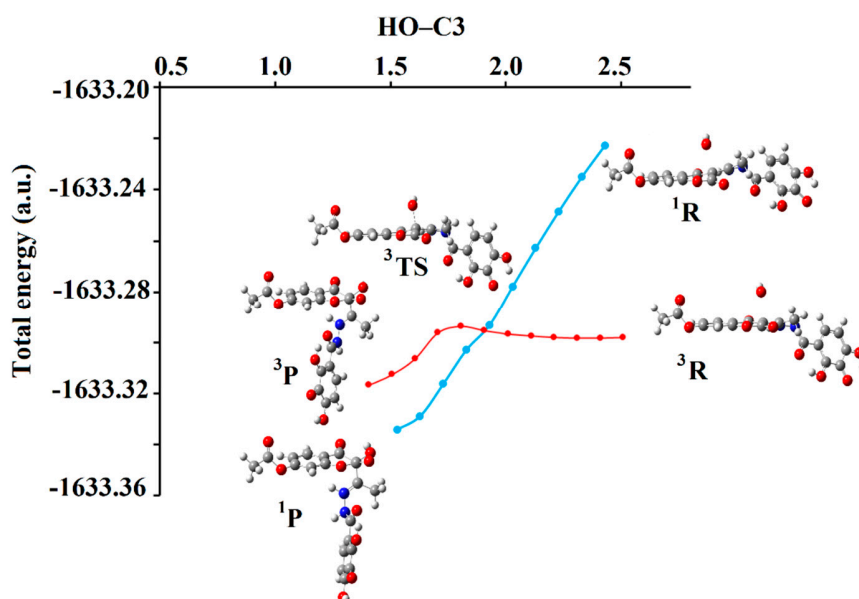

**Figure S19.** Energy profile for the RCF reaction path between  $\text{H}_3\text{A}^\bullet$  of compound **1** and  $\text{HO}^\bullet$  in the singlet (blue) and triplet (red) spin states. Interatomic distances are given in angstroms [ $\text{\AA}$ ]

**Table S4.** Estimation values of overall rate constants ( $k_{\text{overall}}$ ), relative antiradical capacity ( $r^T$ ) and branching ratios,  $\Gamma_i$  (%), for exergonic reaction pathways evaluated at physiological conditions, pH=7.4.

| Mechanism                           | Position                   | Compound 1            |                               |                                | Compound 2            |                               |
|-------------------------------------|----------------------------|-----------------------|-------------------------------|--------------------------------|-----------------------|-------------------------------|
|                                     |                            | H <sub>4</sub> A      | H <sub>3</sub> A <sup>−</sup> | H <sub>2</sub> A <sup>2−</sup> | H <sub>4</sub> A      | H <sub>3</sub> A <sup>−</sup> |
| HAT/PCET                            | 2''-OH/3''-OH              | 0.0                   | 1.6                           | /                              | 0.0                   | 0.9                           |
|                                     | 3''-OH/4''-OH              | 0.0                   | /                             | /                              | 0.0                   | /                             |
|                                     | 4''-OH/5''-OH              | 0.0                   | 1.6                           | 0.4                            | 0.0                   | 0.9                           |
|                                     | 2-NH                       | 3.1                   | 1.6                           | 0.4                            | 3.7                   | 0.9                           |
| RAF/RCF                             | C-3                        | 0.1                   | 22.0                          | 5.6                            | 0.0                   | 12.6                          |
|                                     | C-5                        | 0.0                   |                               |                                | 0.0                   |                               |
|                                     | C-6                        | 0.1                   |                               |                                | 0.0                   |                               |
|                                     | C-7                        | 0.0                   |                               |                                | 0.0                   |                               |
|                                     | C-8                        | 0.1                   |                               |                                | 0.0                   |                               |
|                                     | C-9                        | 0.0                   |                               |                                | 0.0                   |                               |
|                                     | C-10                       | 0.0                   |                               |                                | 0.0                   |                               |
|                                     | C-1'                       | 0.0                   |                               |                                | 0.0                   |                               |
|                                     | C-1''                      | 0.1                   |                               |                                | 0.2                   |                               |
|                                     | C-2''                      | 0.1                   |                               |                                | 1.1                   |                               |
|                                     | C-3''                      | 0.3                   |                               |                                | 0.0                   |                               |
|                                     | C-4''                      | 0.1                   |                               |                                | 0.1                   |                               |
|                                     | C-5''                      | 0.1                   |                               |                                | 0.0                   |                               |
|                                     | C-6''                      | 0.1                   |                               |                                | 0.0                   |                               |
| SPL/SET                             | <i>n</i> -OH/ <i>n</i> -NH | 12.3                  | 6.2                           | 0.4                            | 14.7                  | 3.9                           |
| ET/PT                               | 2''-O/3''-O                | 12.9                  | 1.6                           | /                              | 15.5                  | 0.9                           |
|                                     | 3''-O/4''-O                | 12.2                  | /                             |                                | 15.5                  | /                             |
|                                     | 4''-O/5''-O                | 12.9                  | 1.6                           | 0.4                            | 15.3                  | 0.9                           |
|                                     | 2-N                        | 0.2                   | 1.6                           |                                | 11.3                  | 0.9                           |
| <i>k</i> <sub>overall</sub>         |                            | 3.75×10 <sup>10</sup> |                               |                                | 4.11×10 <sup>10</sup> |                               |
| <i>r</i> <sup>T</sup> <sub>Tx</sub> |                            | 19.1                  |                               |                                | 21.2                  |                               |
| <i>r</i> <sup>T</sup> <sub>GA</sub> |                            | 1.5                   |                               |                                | 1.6                   |                               |
